# Supplementary material for: The Holocene sedimentary record of cyanobacterial glycolipids in the Baltic Sea: an evaluation of their application as tracers of past nitrogen fixation
Source: Copernicus journal article supplement (doi:10.5194/bg-14-5789-2017), 2017-12-22
Supplement: Supplementary file 1 [file bg-14-5789-2017-supplement.pdf]

Supplement of Biogeosciences, 14, 5789–5804, 2017  
<https://doi.org/10.5194/bg-14-5789-2017-supplement>  
© Author(s) 2017. This work is distributed under  
the Creative Commons Attribution 4.0 License.

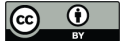

*Supplement of*

**The Holocene sedimentary record of cyanobacterial glycolipids in the Baltic Sea: an evaluation of their application as tracers of past nitrogen fixation**

**Martina Sollai et al.**

*Correspondence to:* Jaap Sinninghe Damsté ([jaap.damste@nioz.nl](mailto:jaap.damste@nioz.nl))

The copyright of individual parts of the supplement might differ from the CC BY 4.0 License.

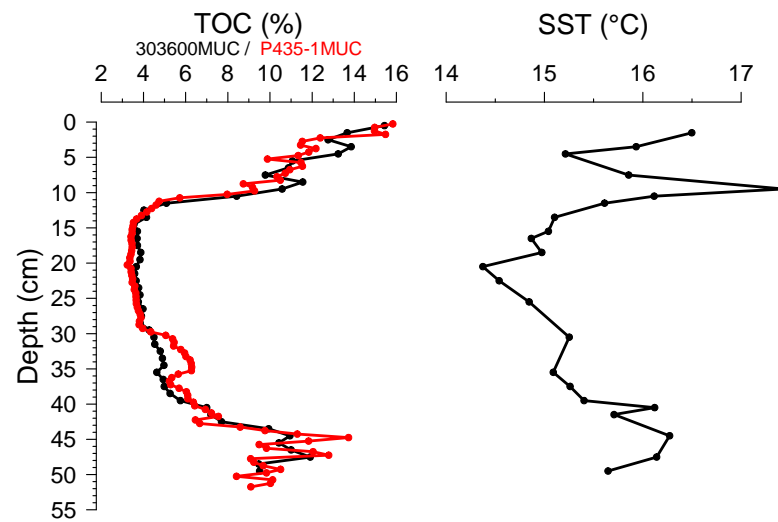

Figure S1: Correlation of the MUC cores 303600 (Kabel et al., 2012) and P435-1 (this work) on the basis of the TOC content. SST data is from MUC 303600 (Kabel et al., 2012).
